# Supplementary material for: Synthesis of 4′-aminopantetheine and derivatives to probe aminoglycoside N-6′-acetyltransferase
Source: Royal Society of Chemistry journal article supplement (doi:10.1039/c0ob01018a), 2010-11-23

## Supporting Information

### Synthesis of 4'-aminopantetheine and derivatives to probe aminoglycoside N-6'-acetyltransferase

Xuxu Yan, T. Olukayode Akinnusi, Aaron T. Larsen, and Karine Auclair\*

*Department of Chemistry, McGill University, 801 Sherbrooke Street West, Montréal,  
Québec, Canada H3A 2K6*

\*Corresponding author

Fax: (+1)514-398-3797

E-mail: [karine.auclair@mcgill.ca](mailto:karine.auclair@mcgill.ca)

|                               |     |
|-------------------------------|-----|
| NMR spectra of compounds..... | S2  |
| HPLC traces of compounds..... | S20 |

## NMR Spectra

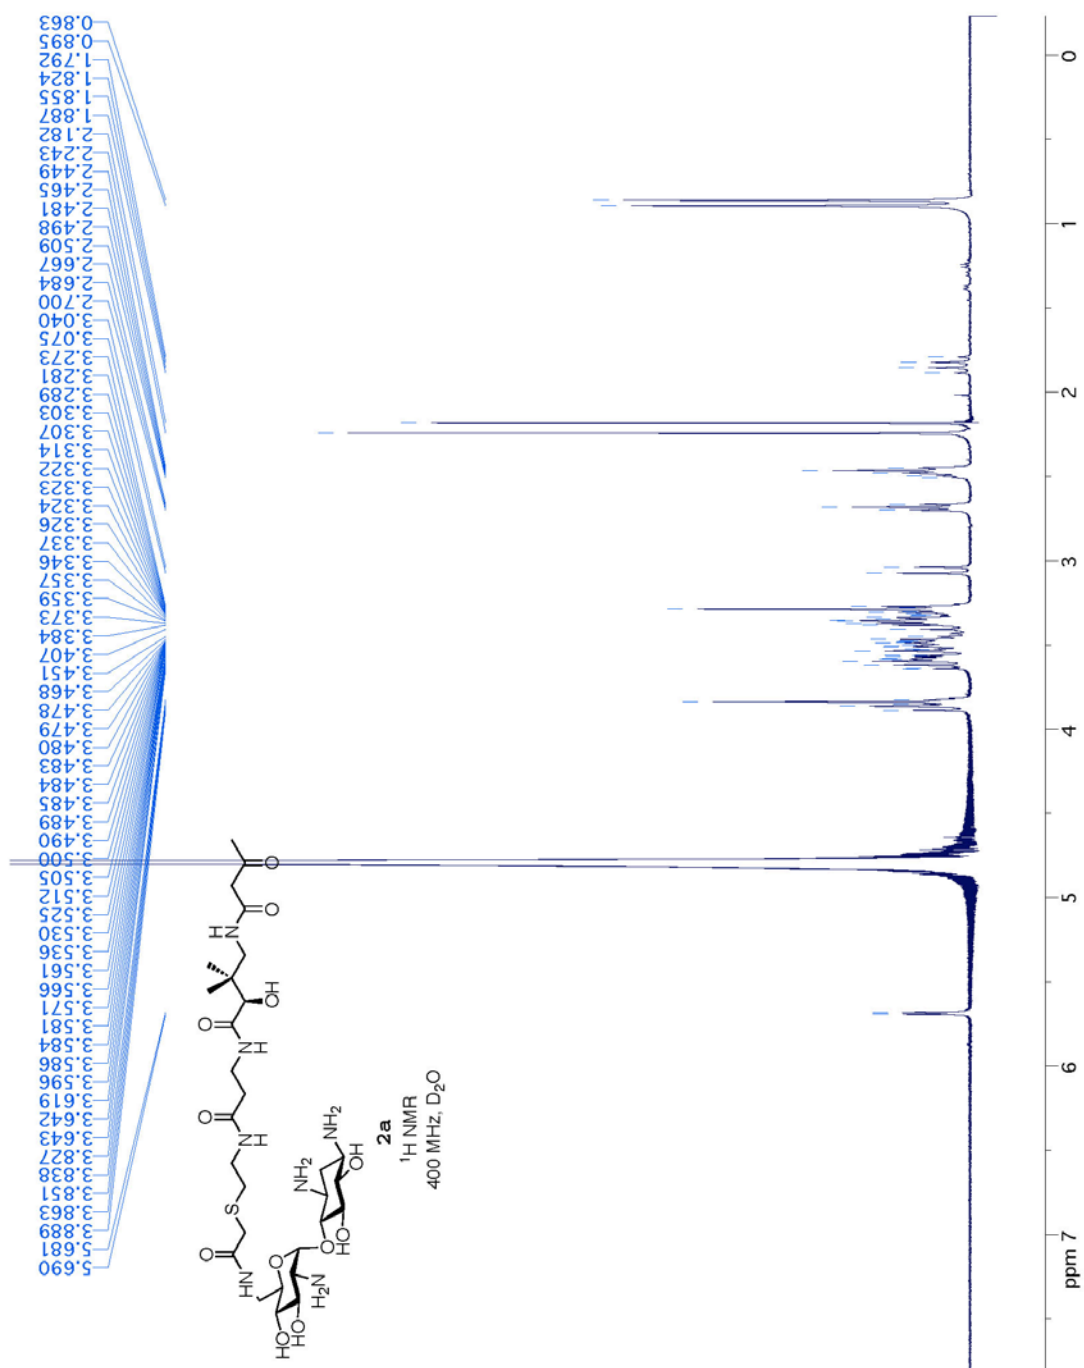

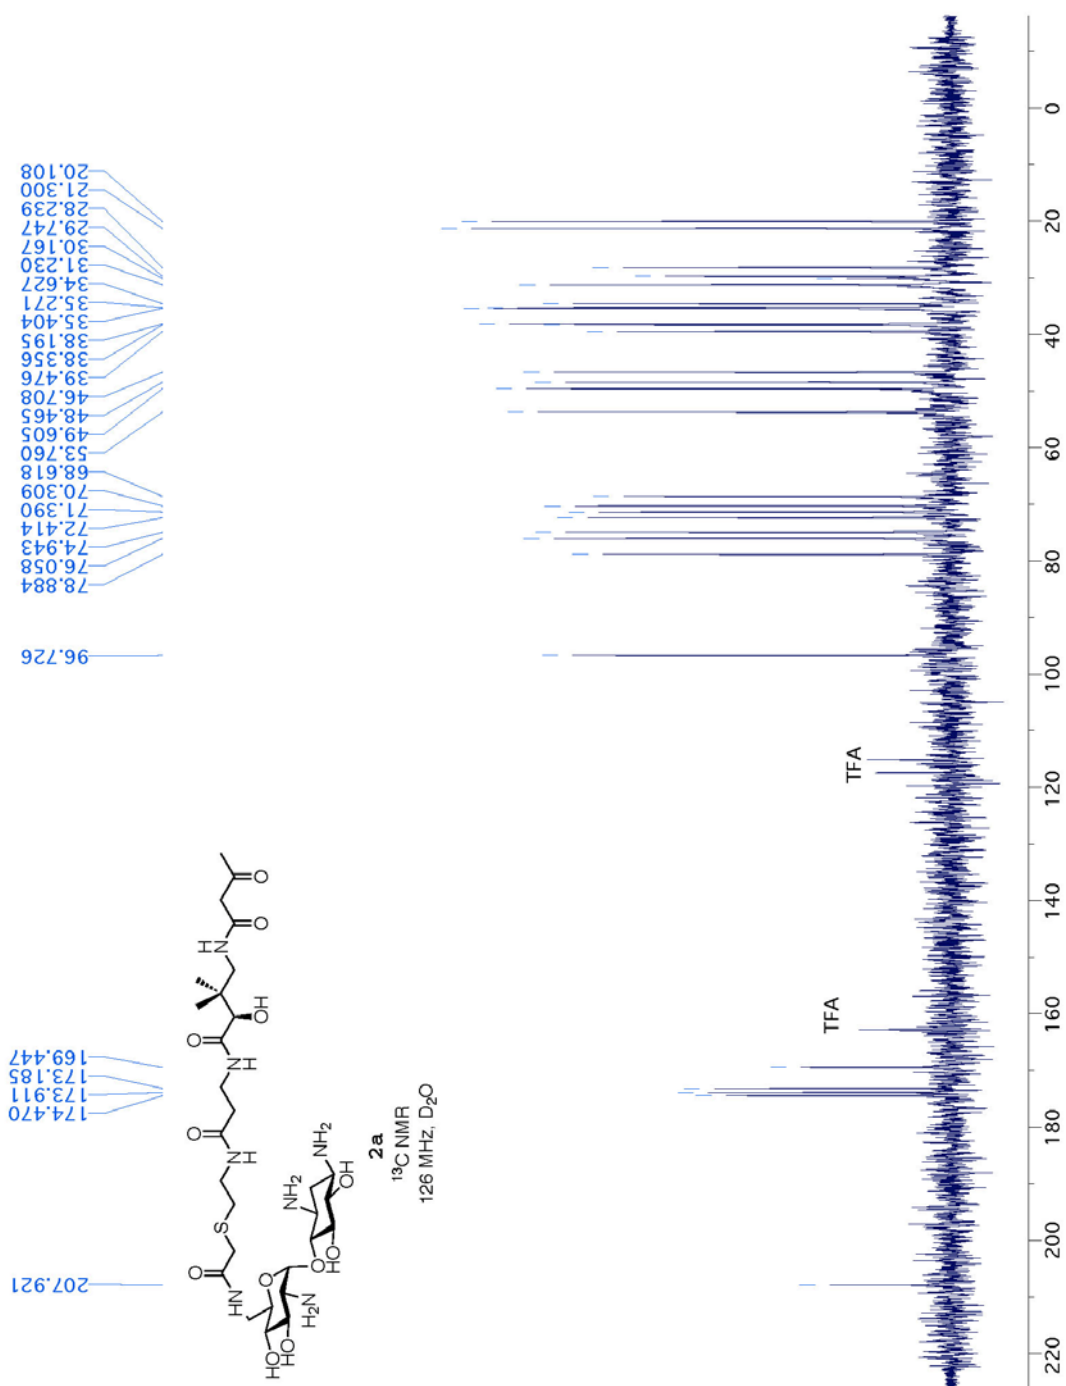

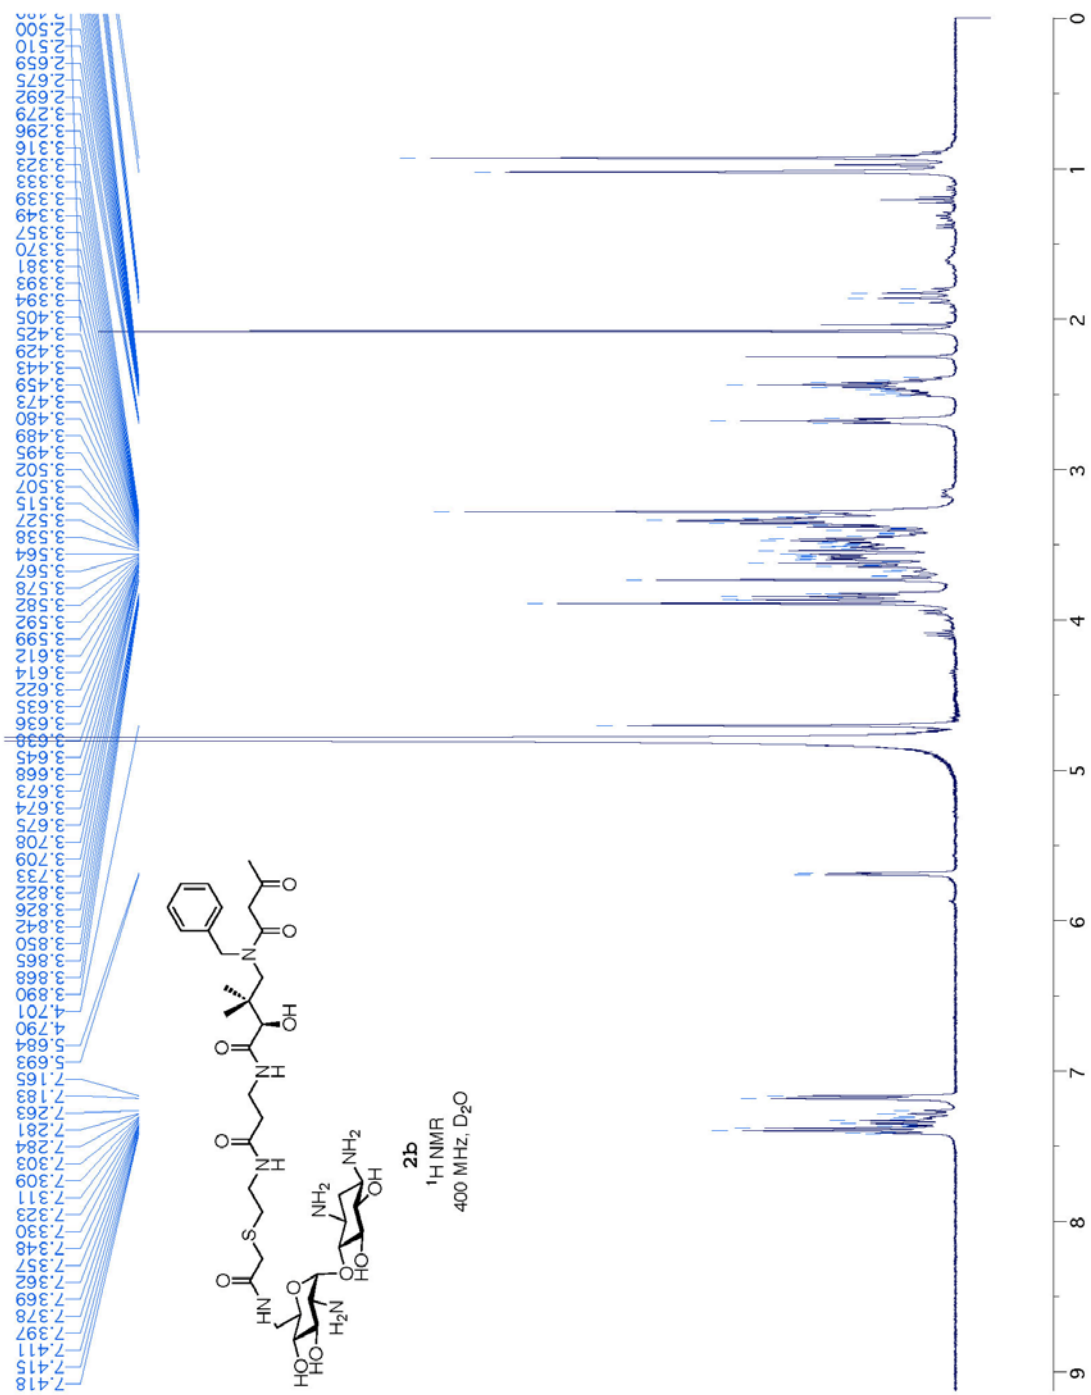

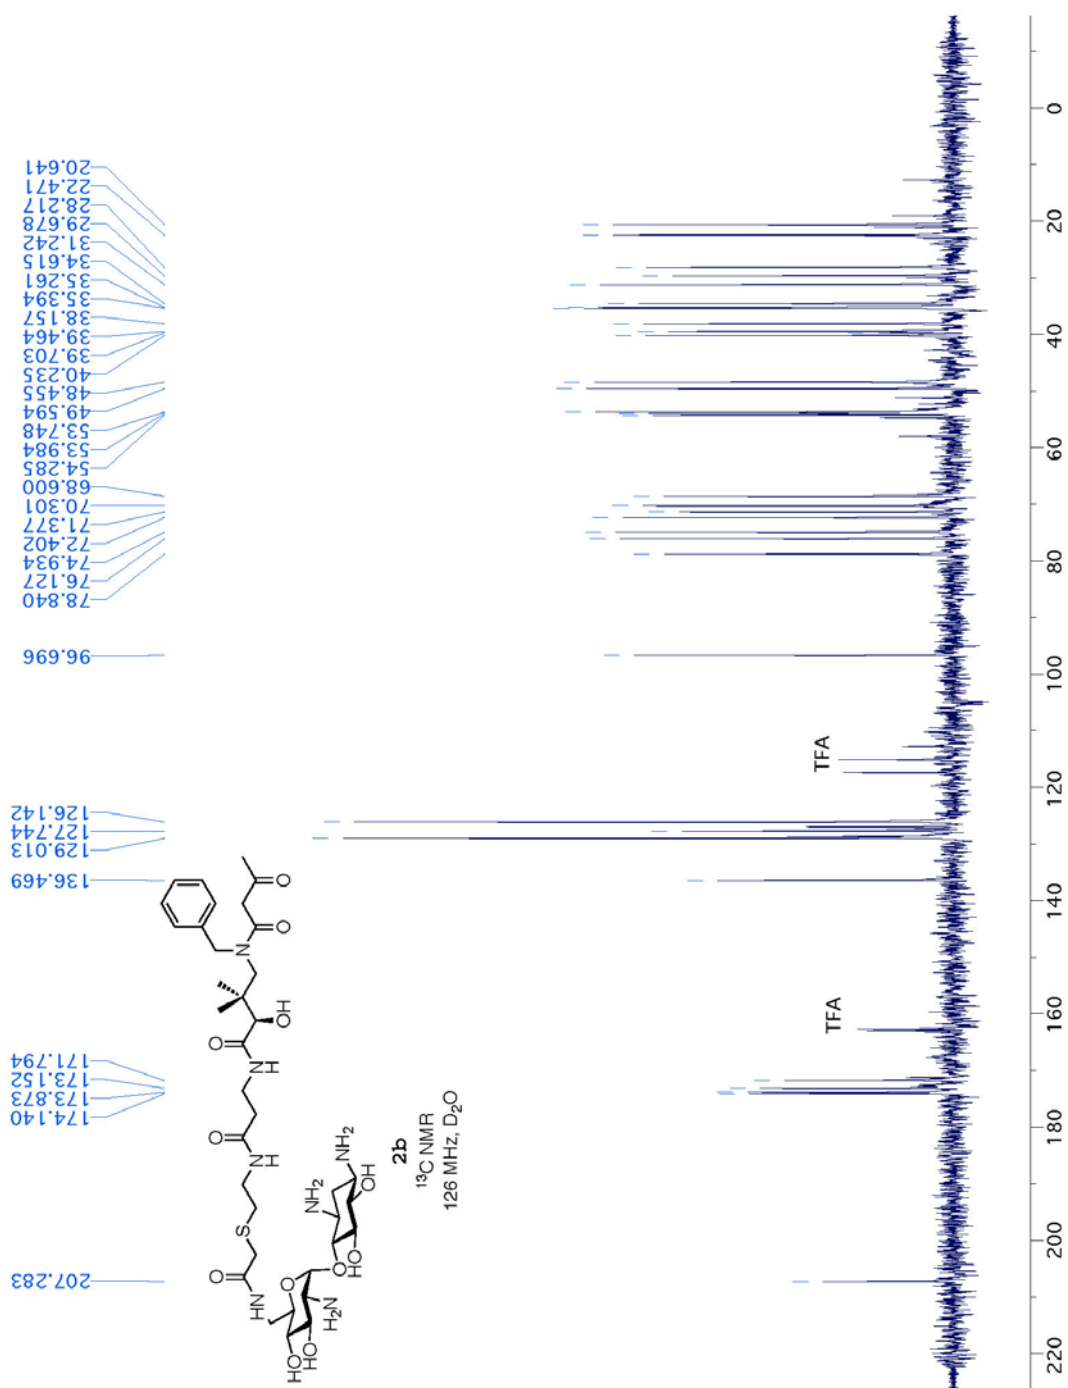

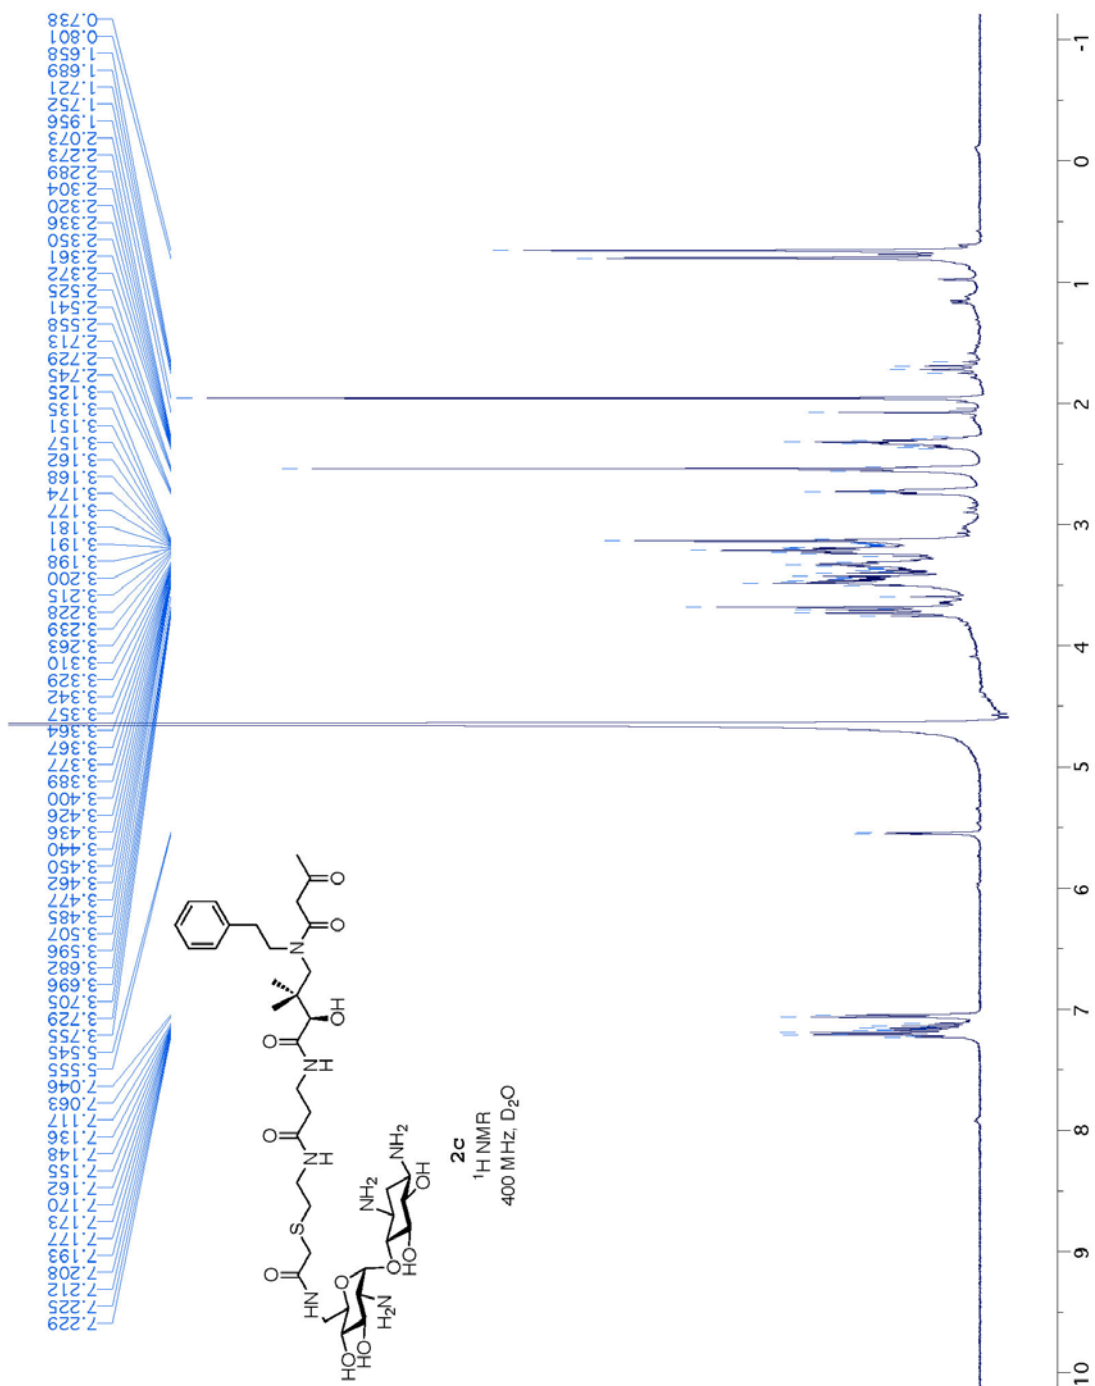

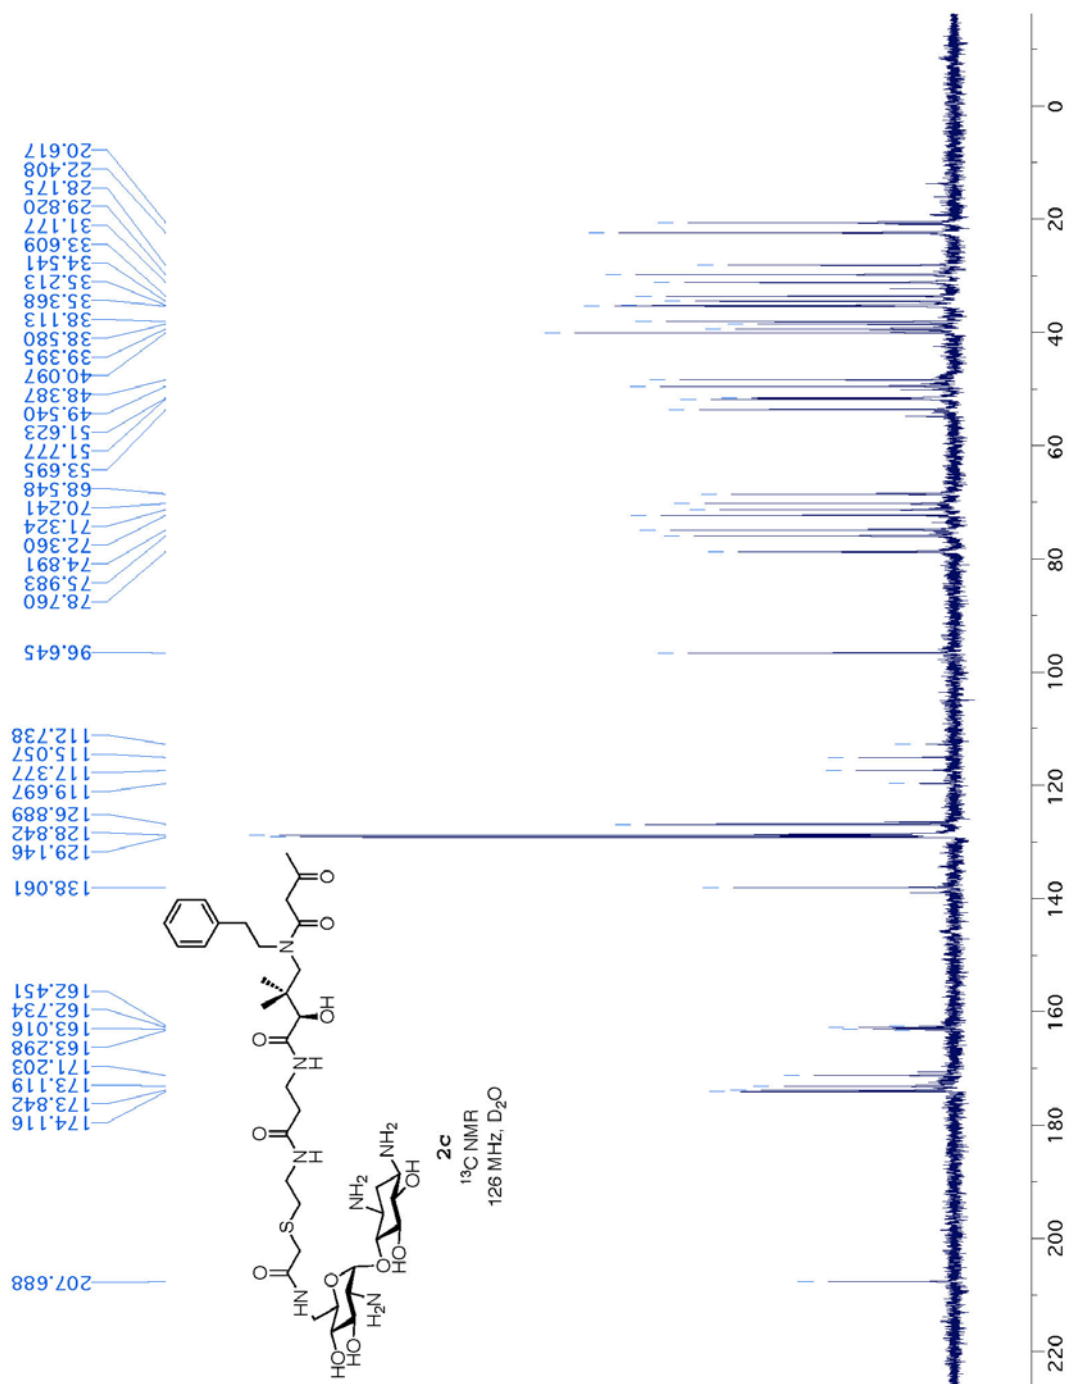

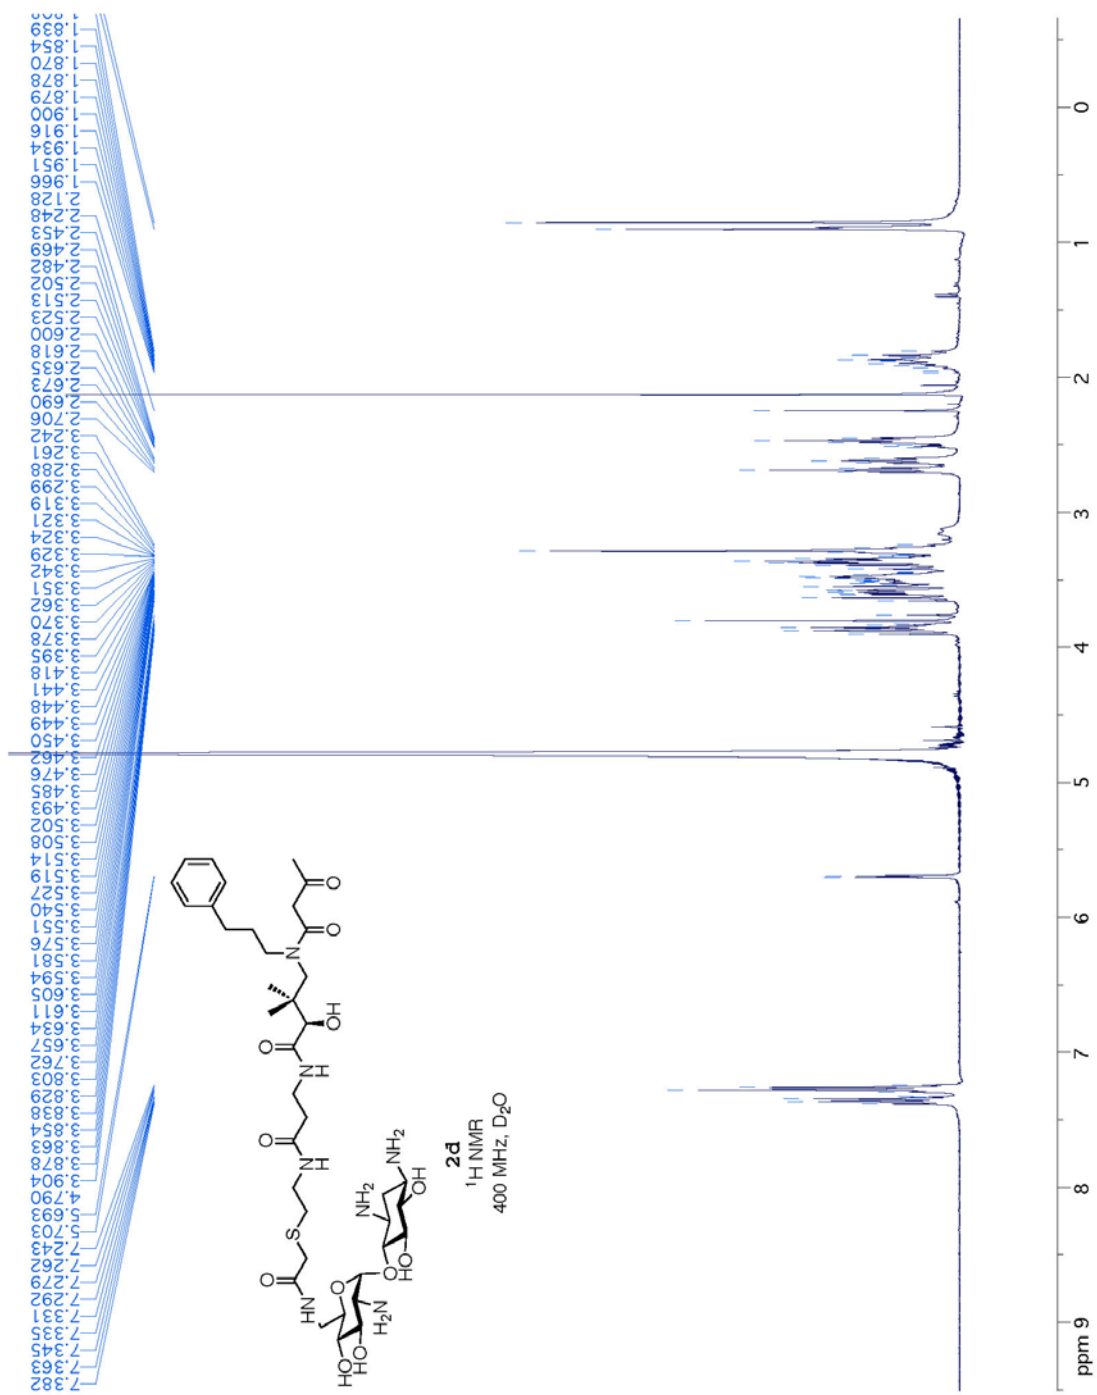



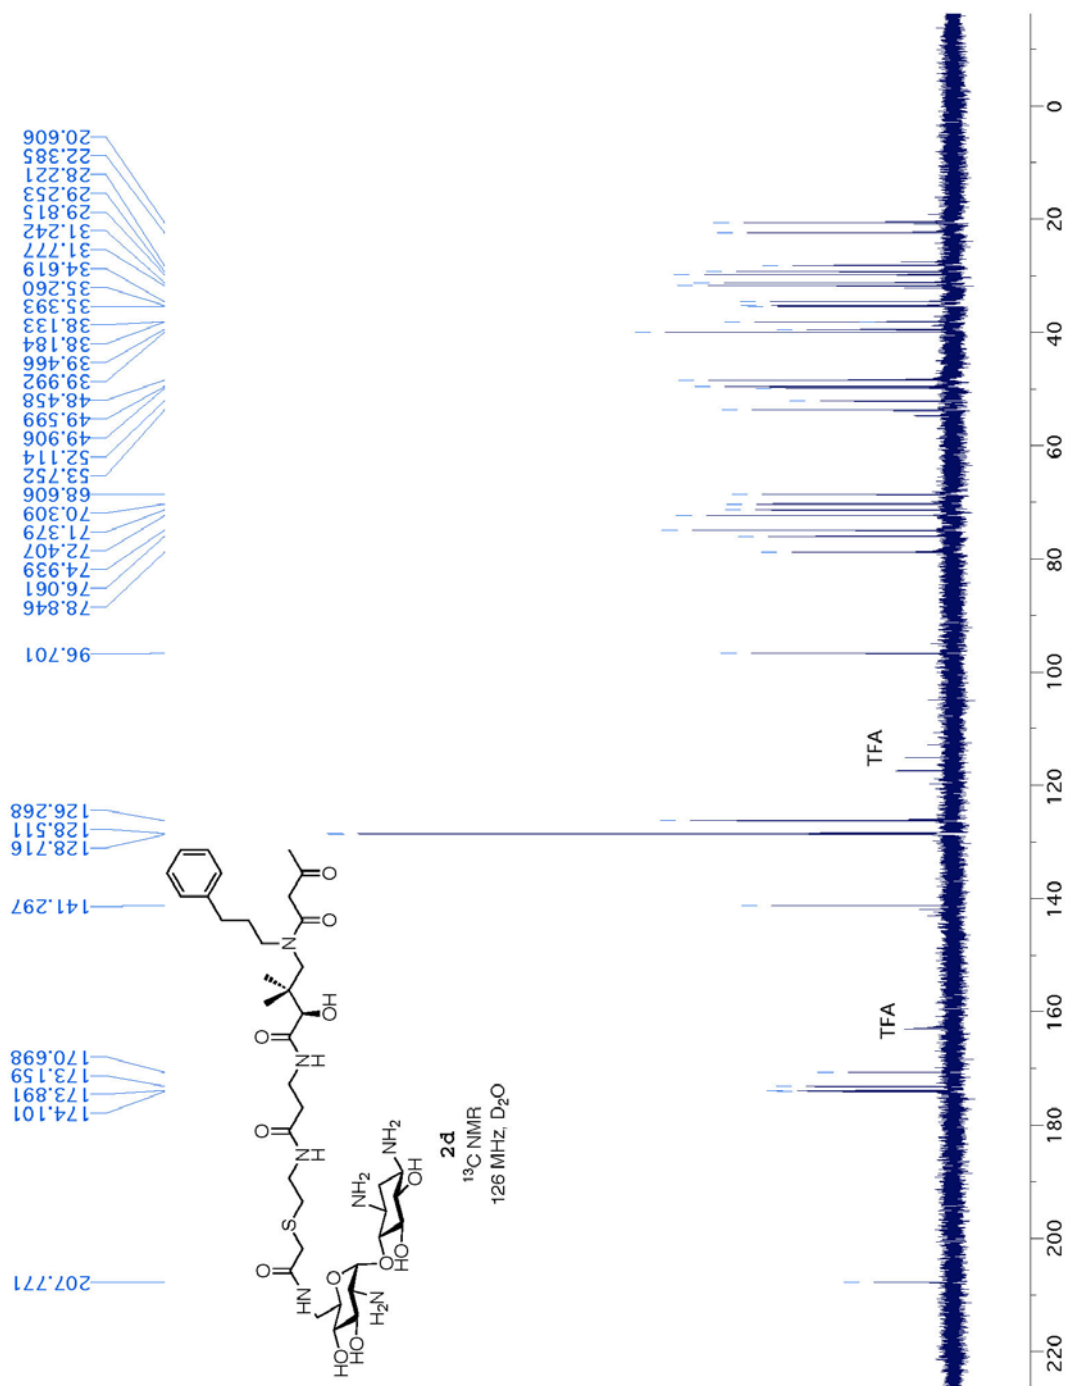

### Compound 3

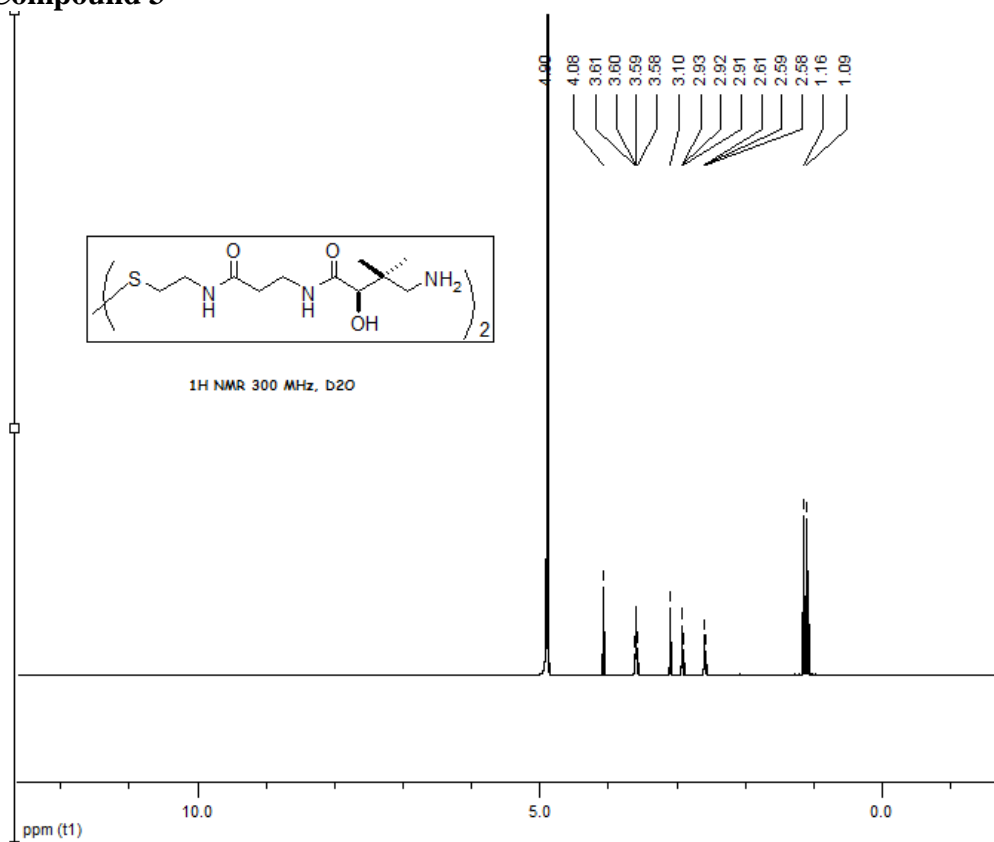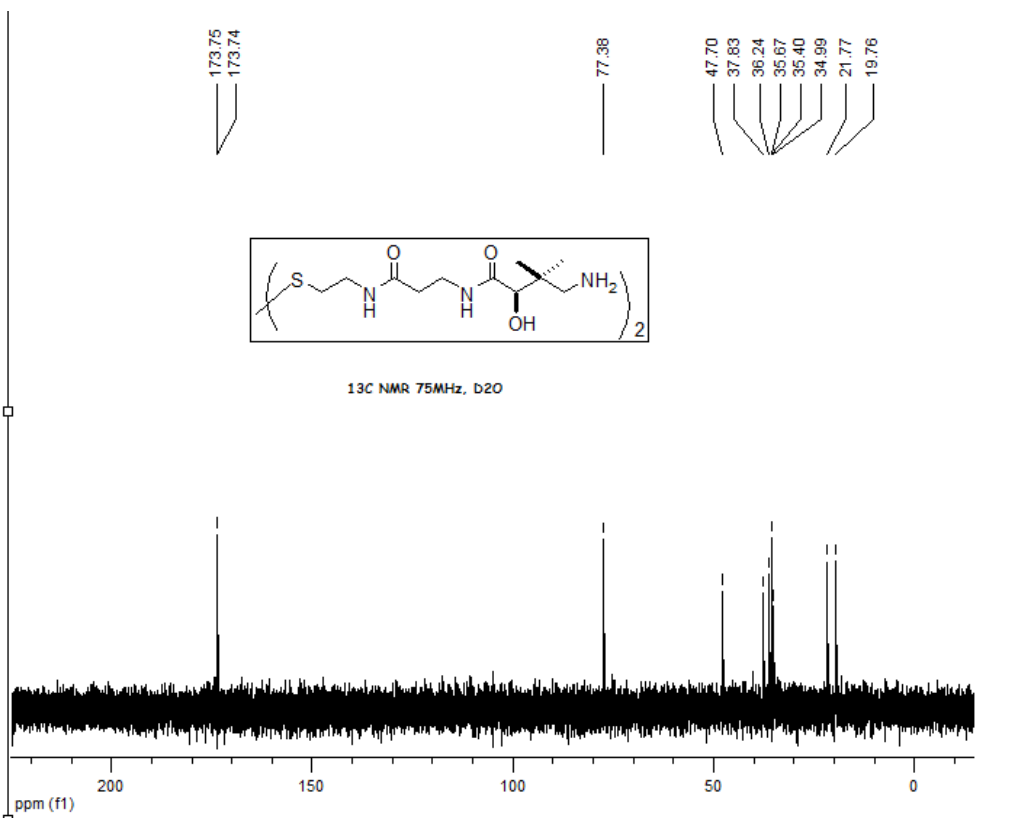

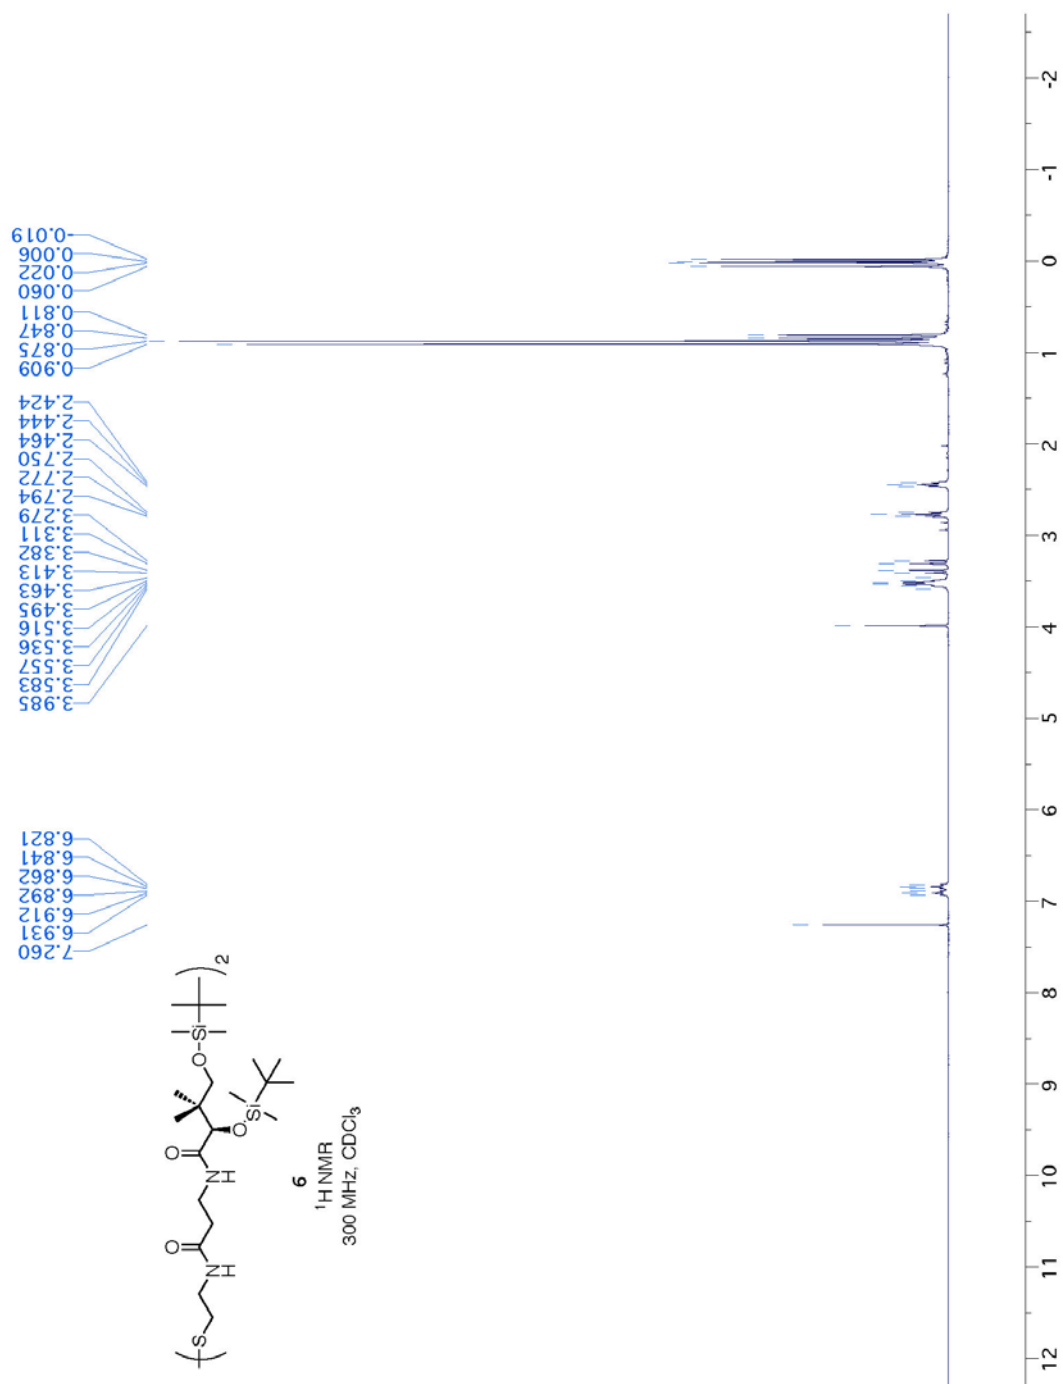

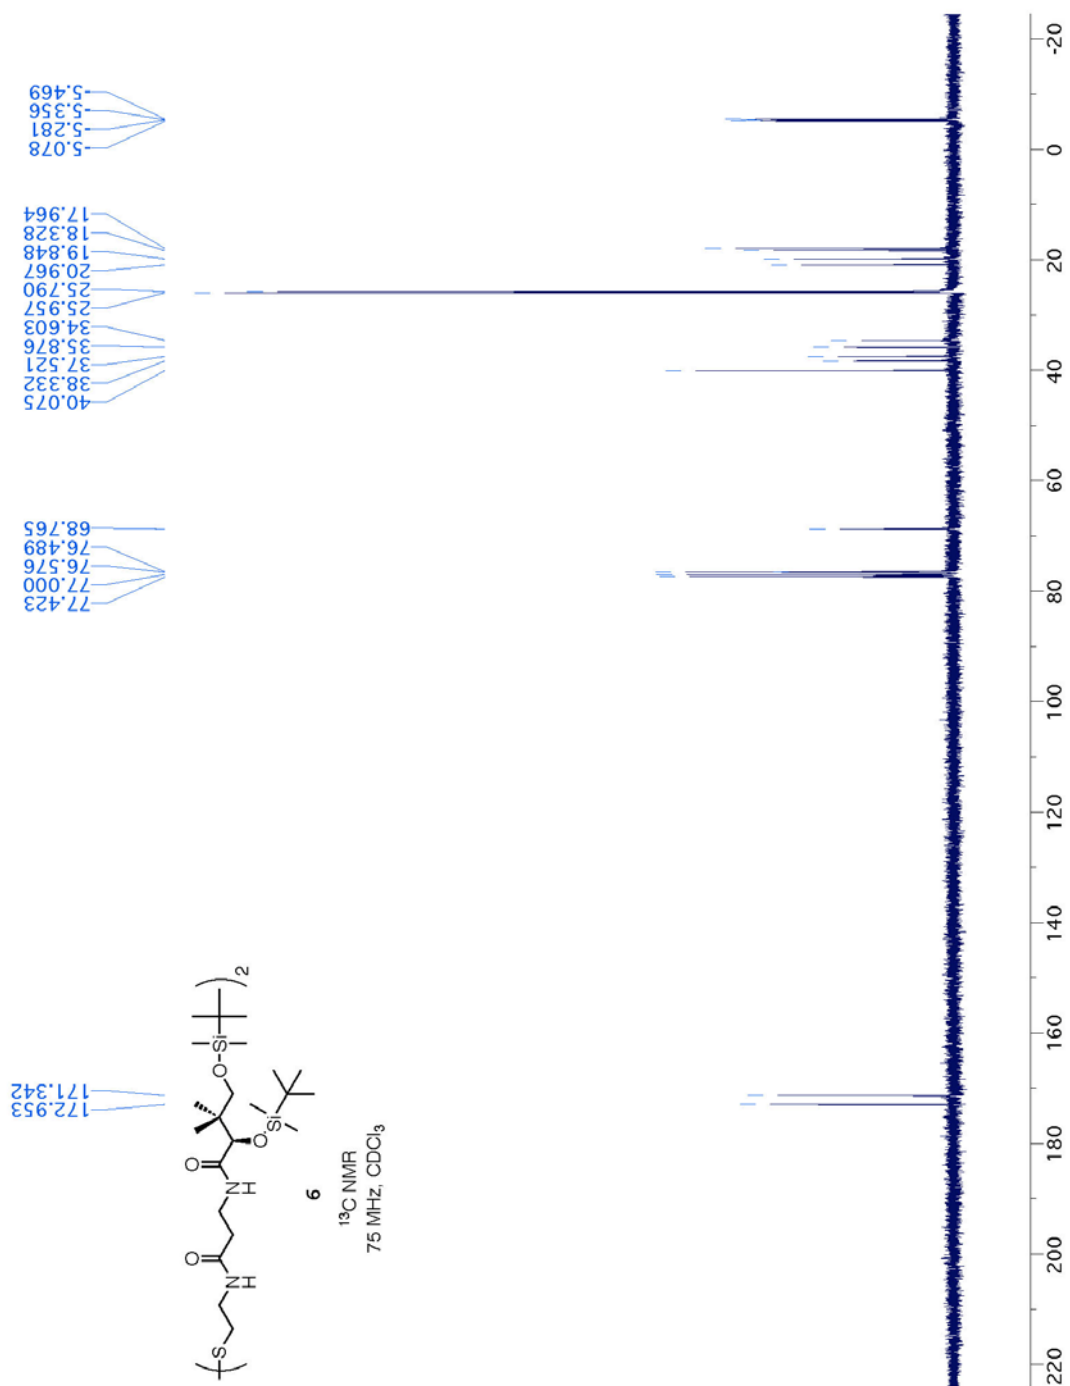

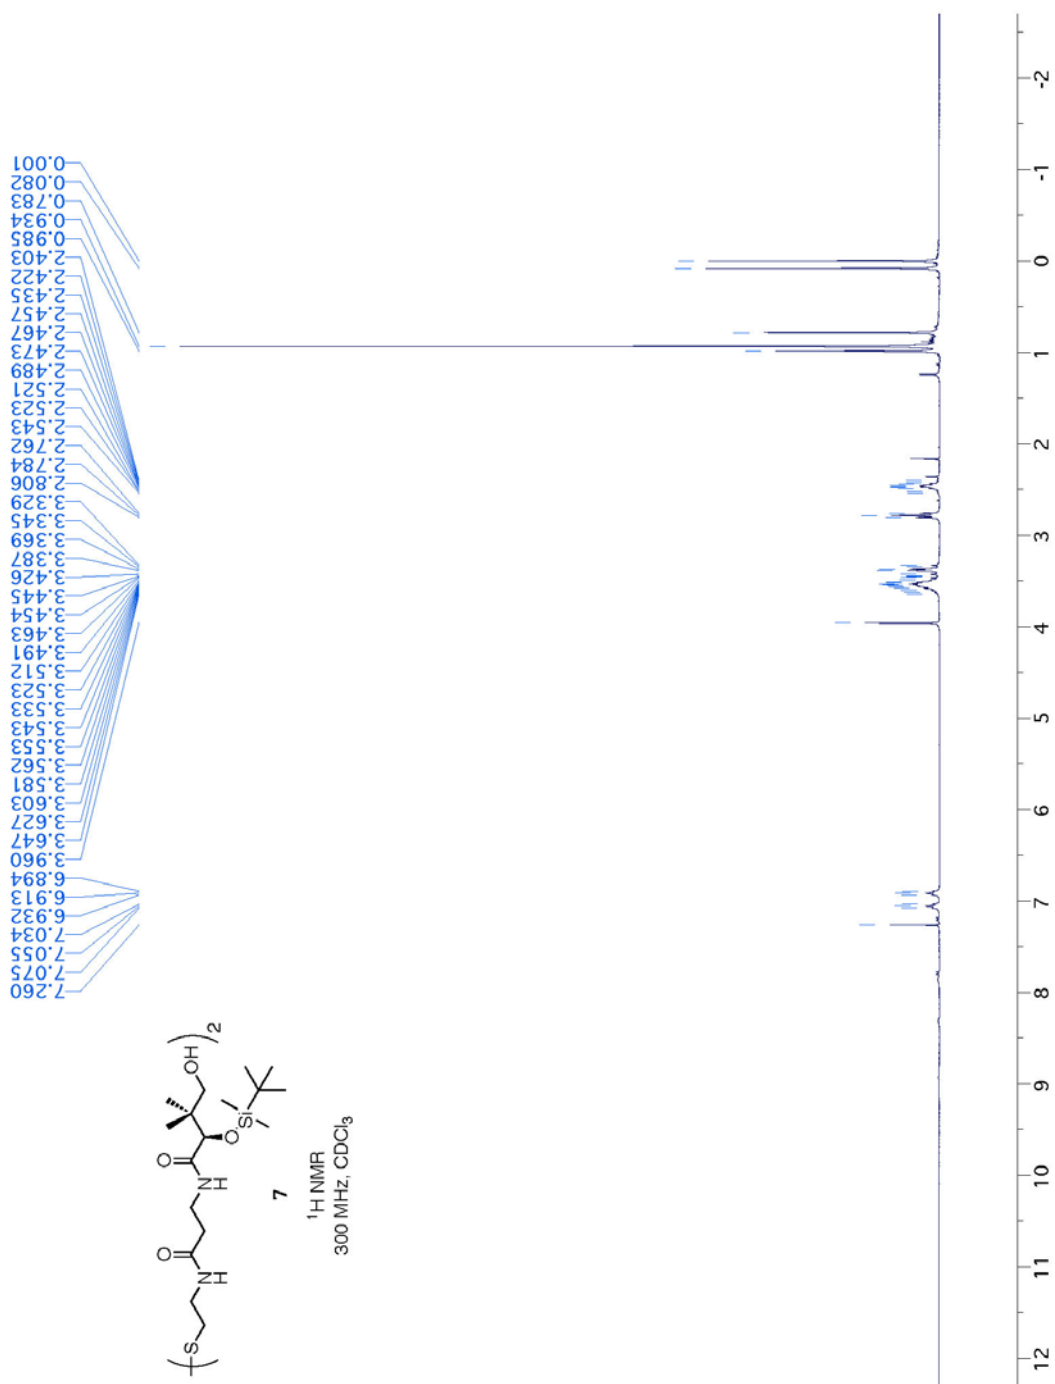

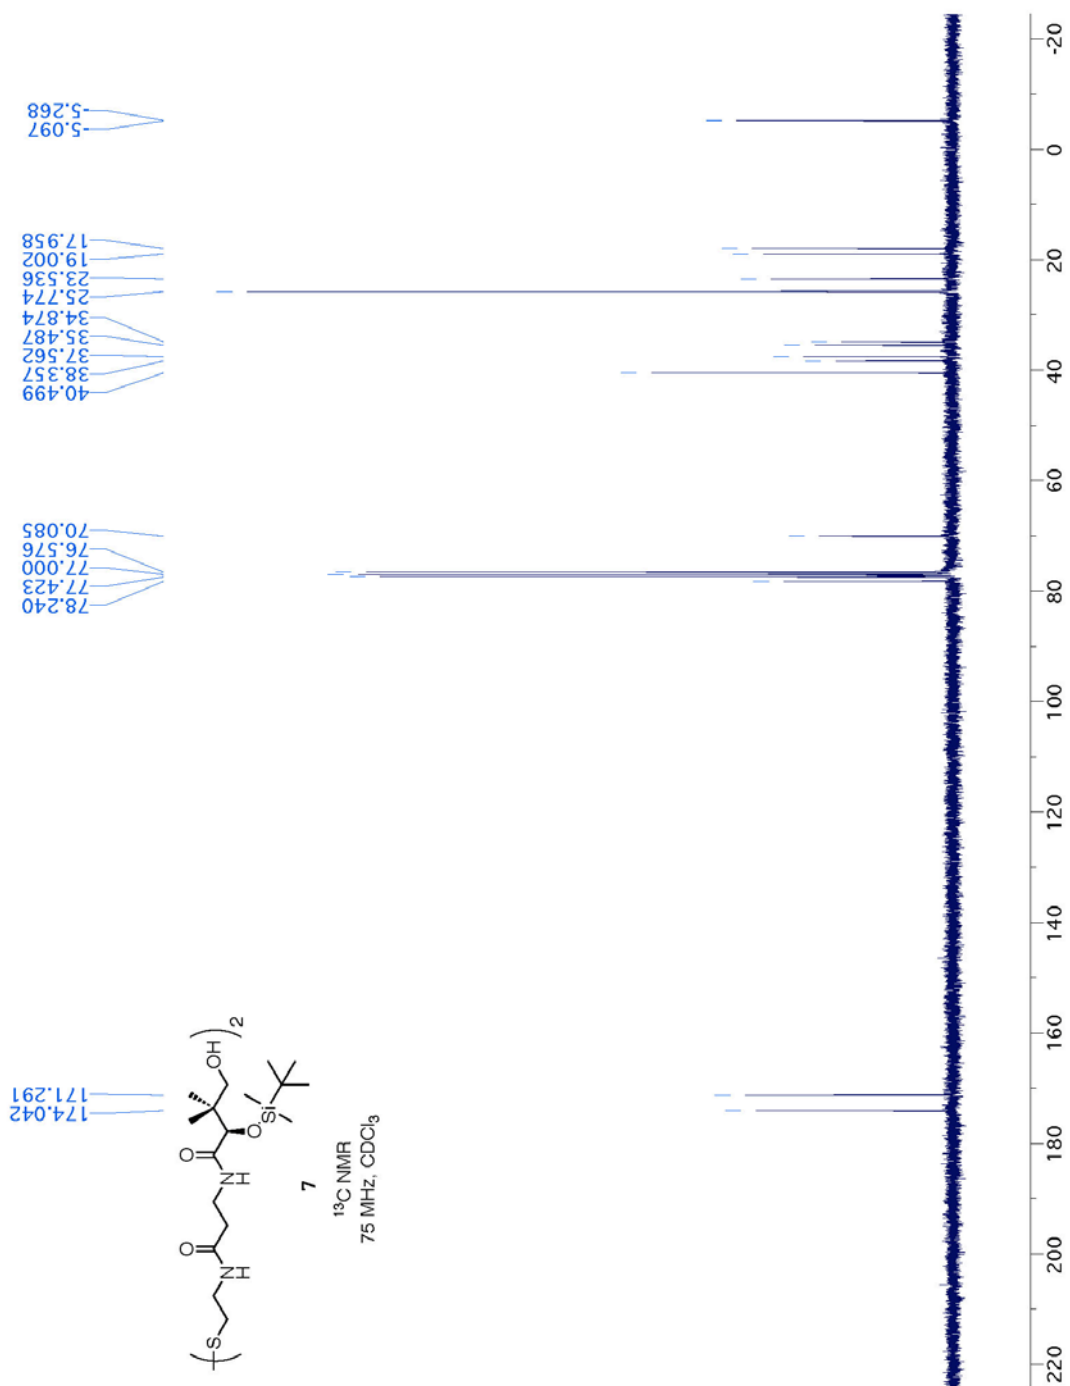

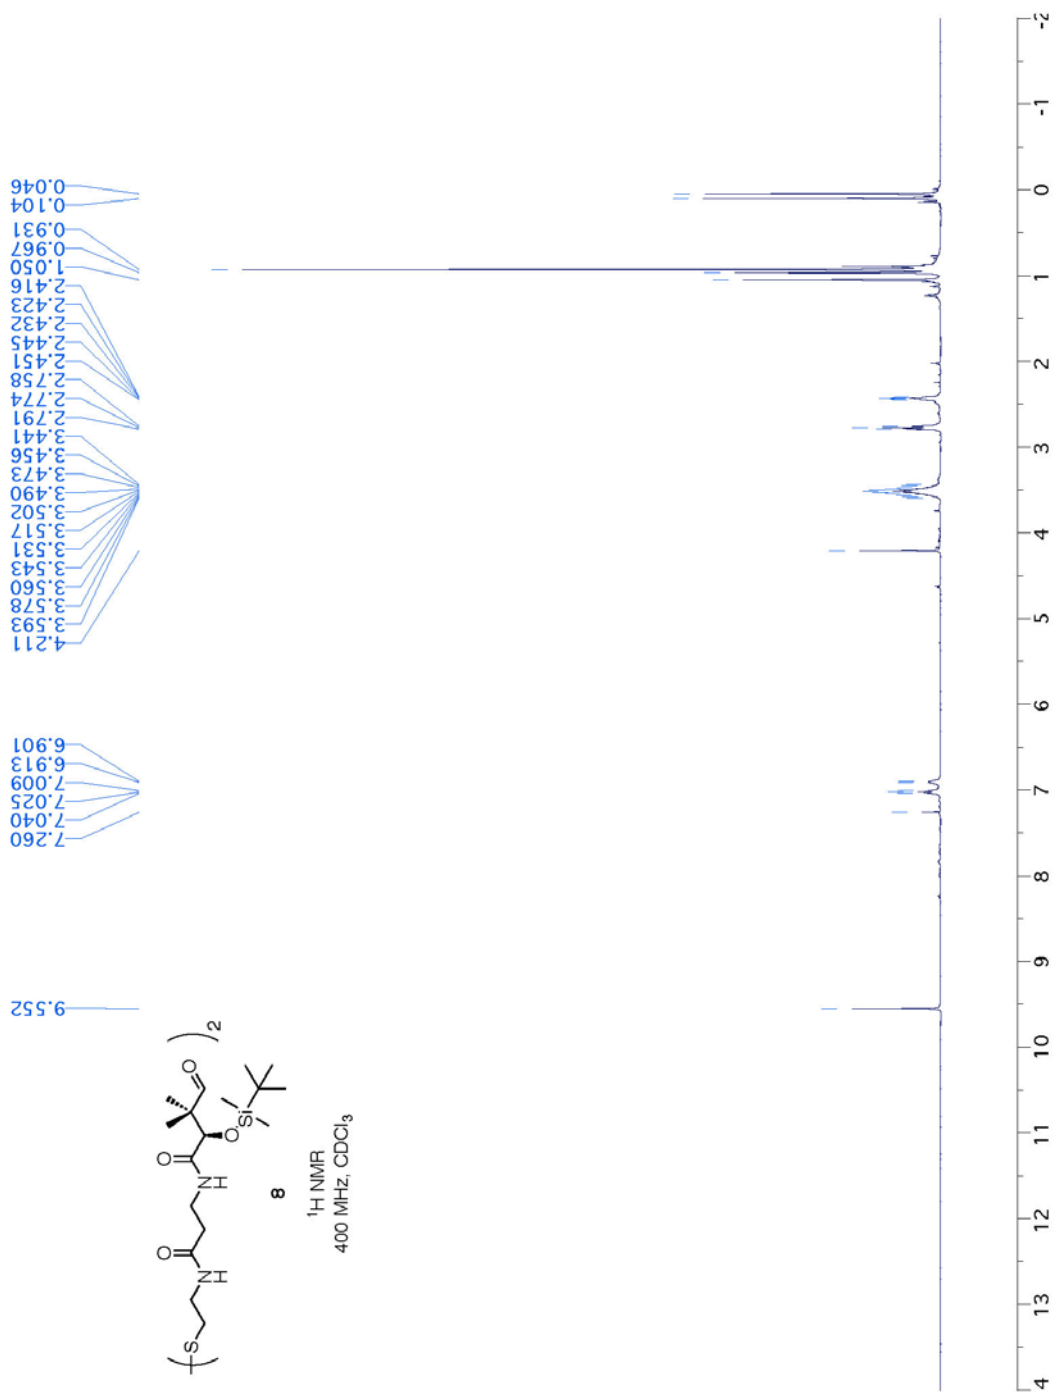

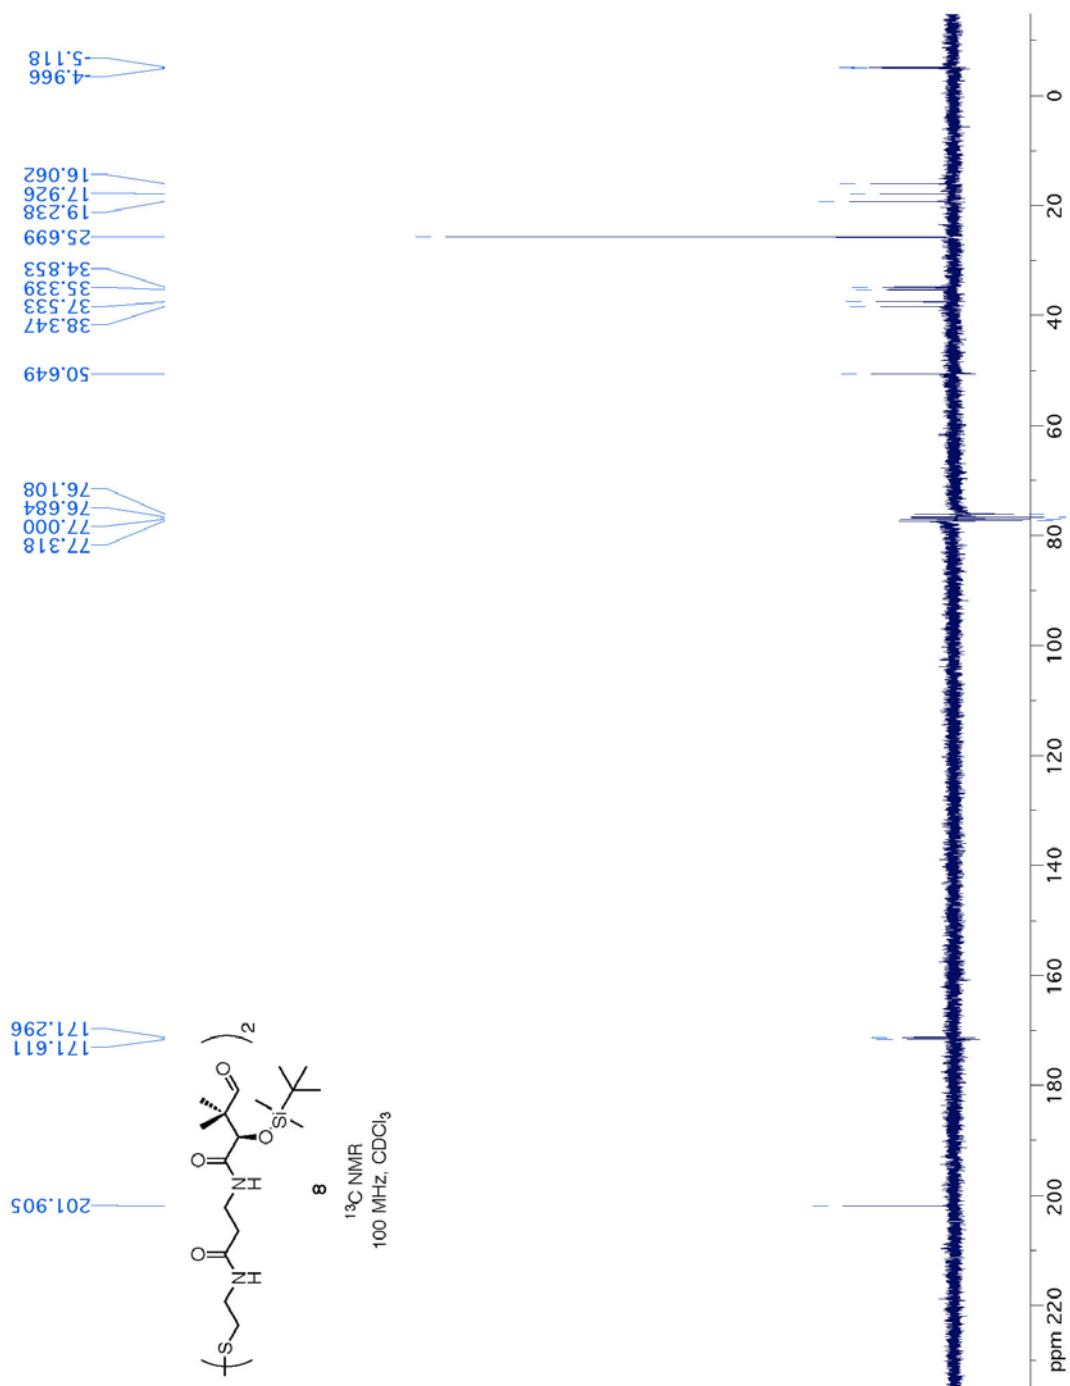



### Compound 11

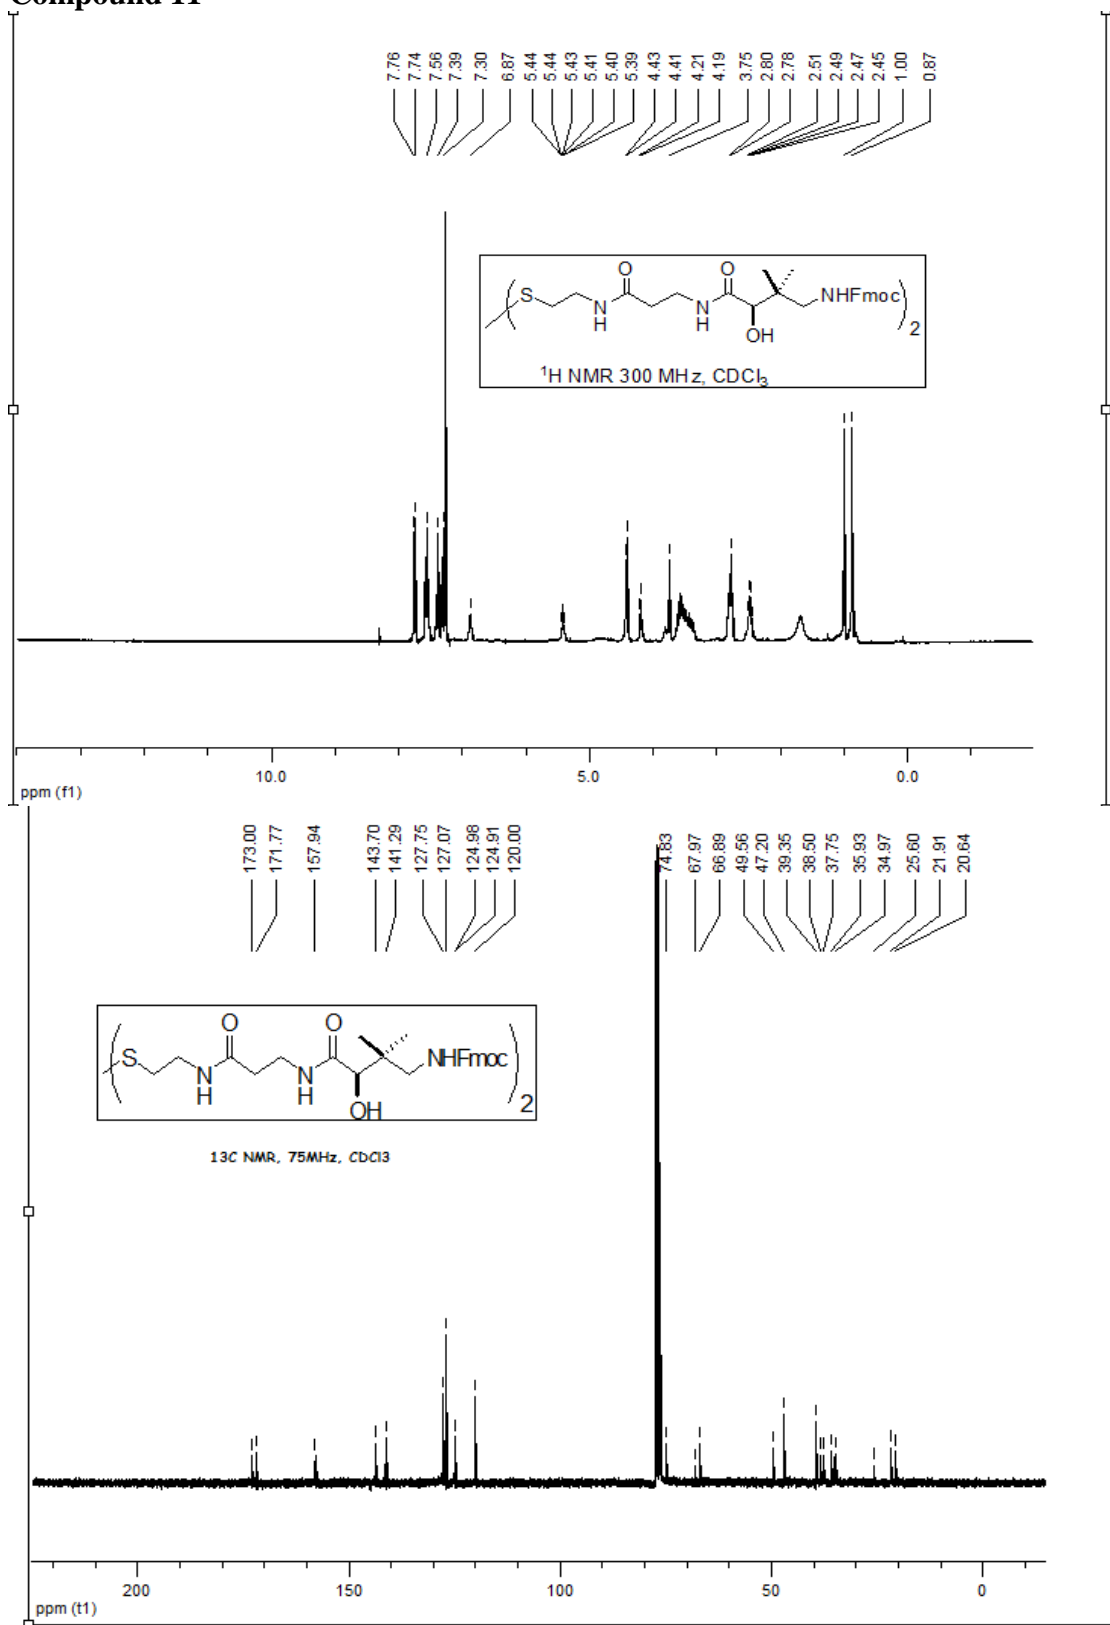

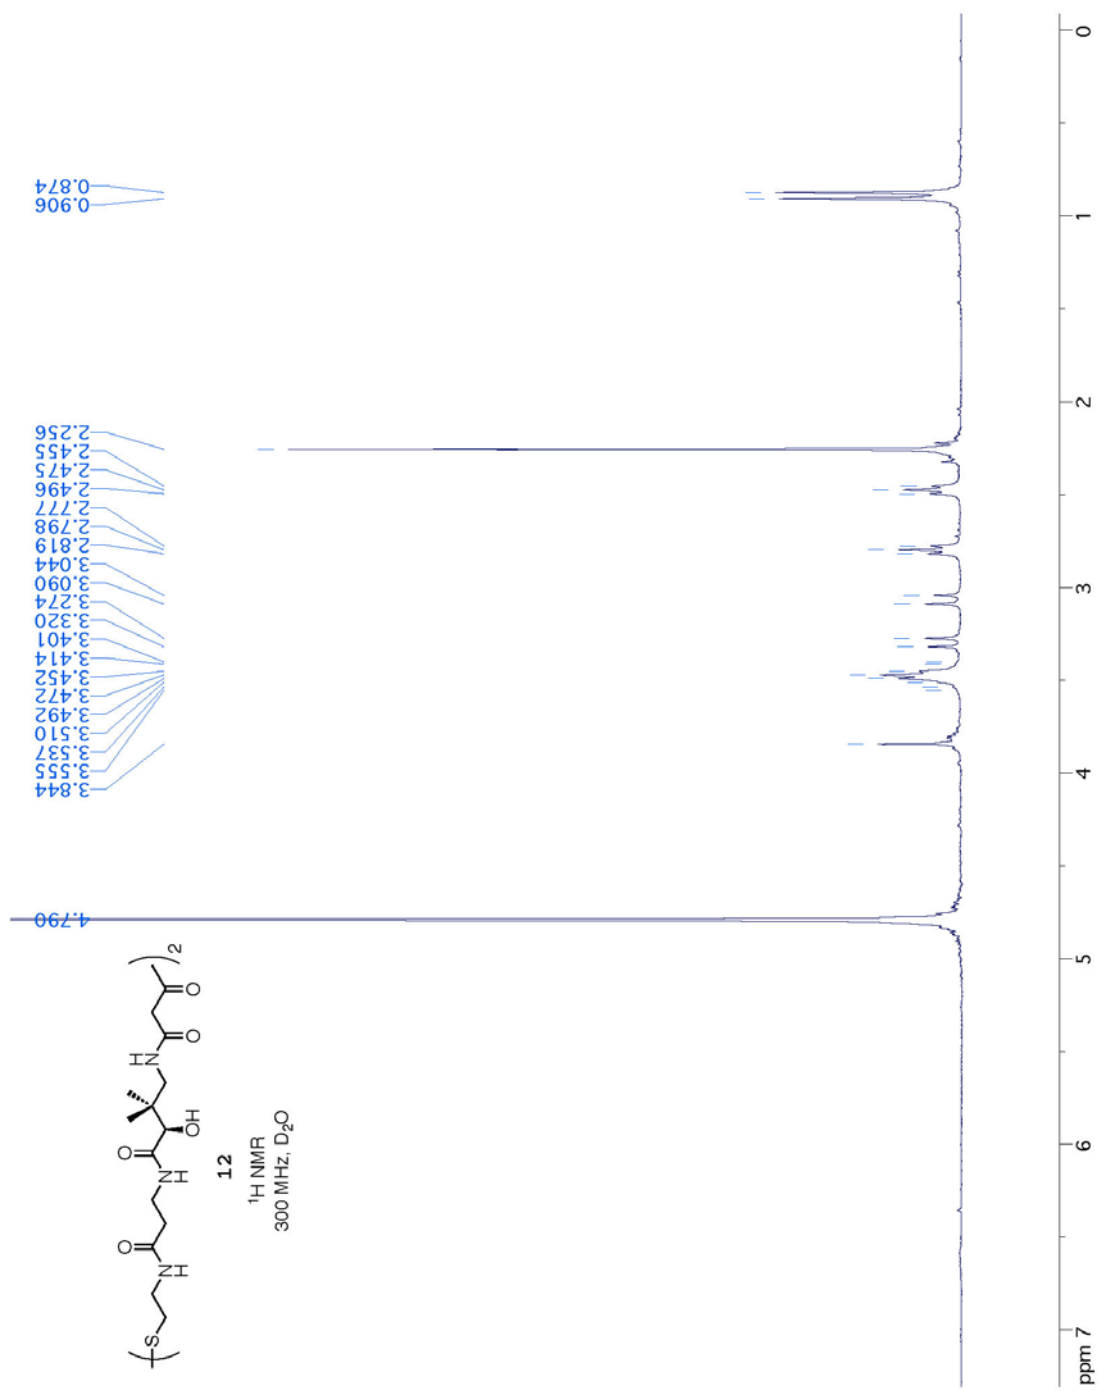

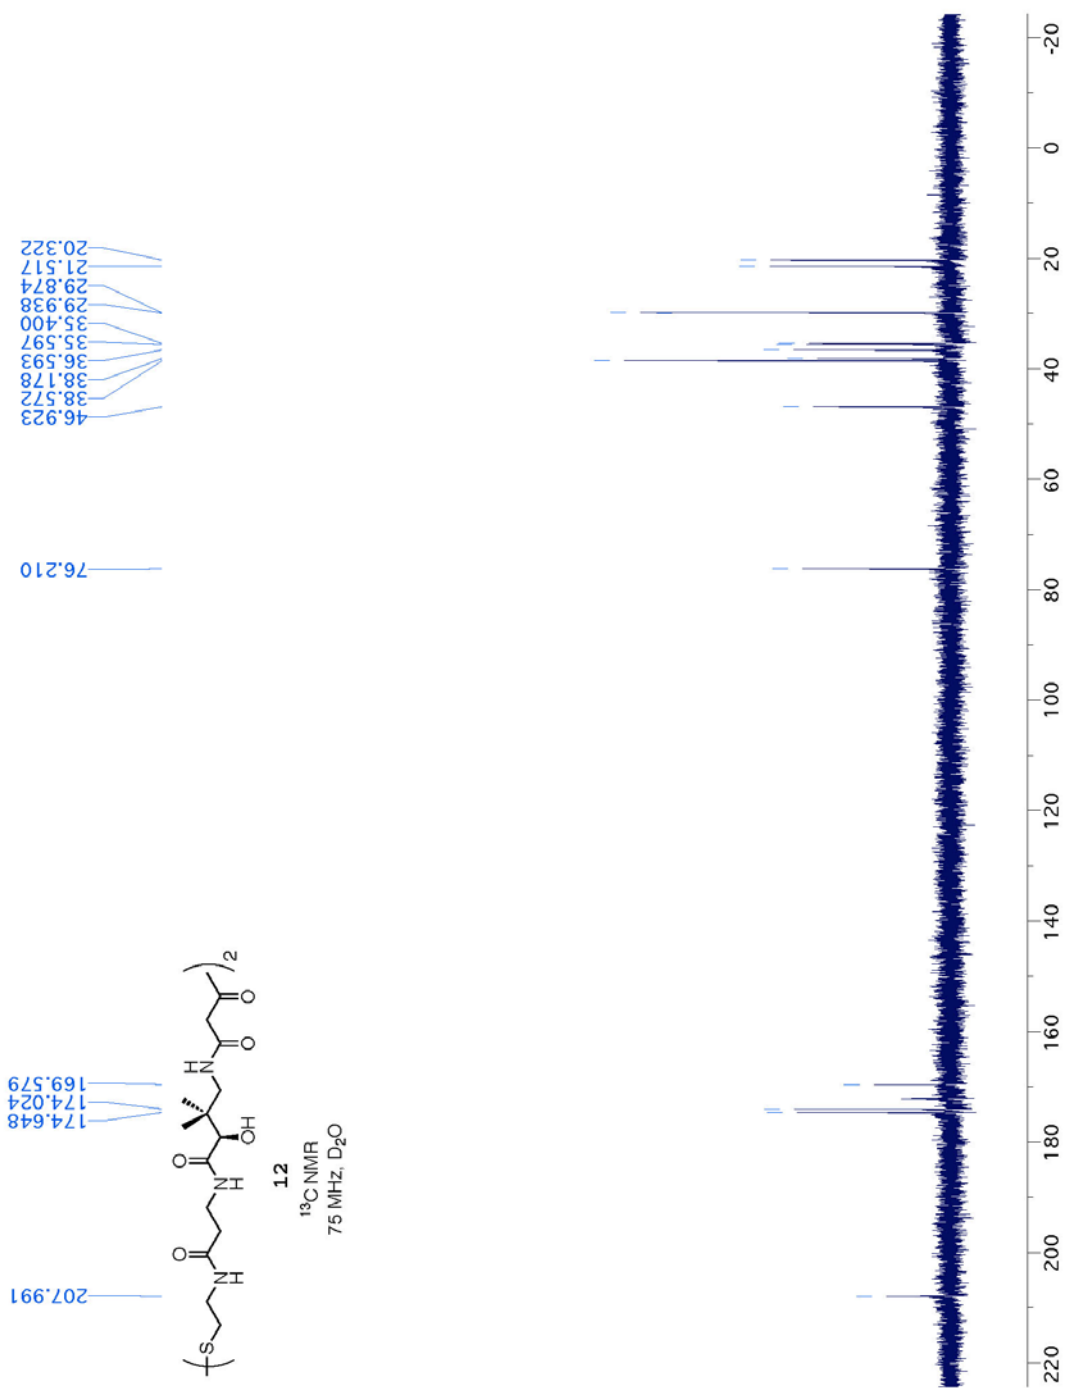

## HPLC Traces

### Compound 3

Method D,  $t_R = 10.15$  min

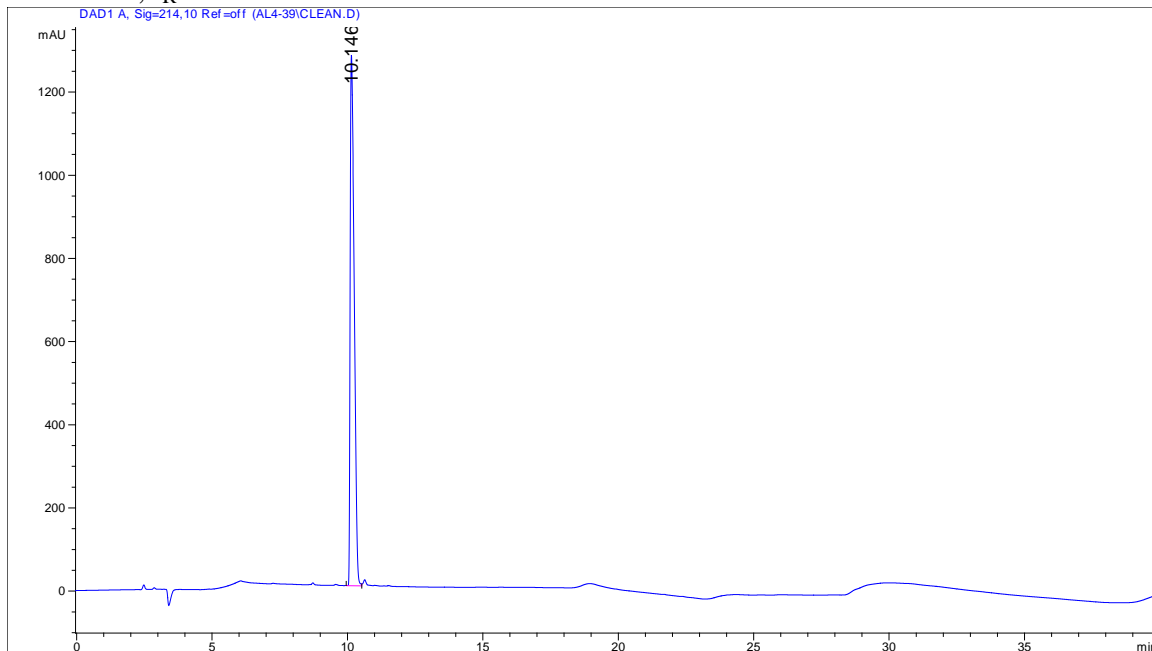

Method E,  $t_R = 7.41$  min

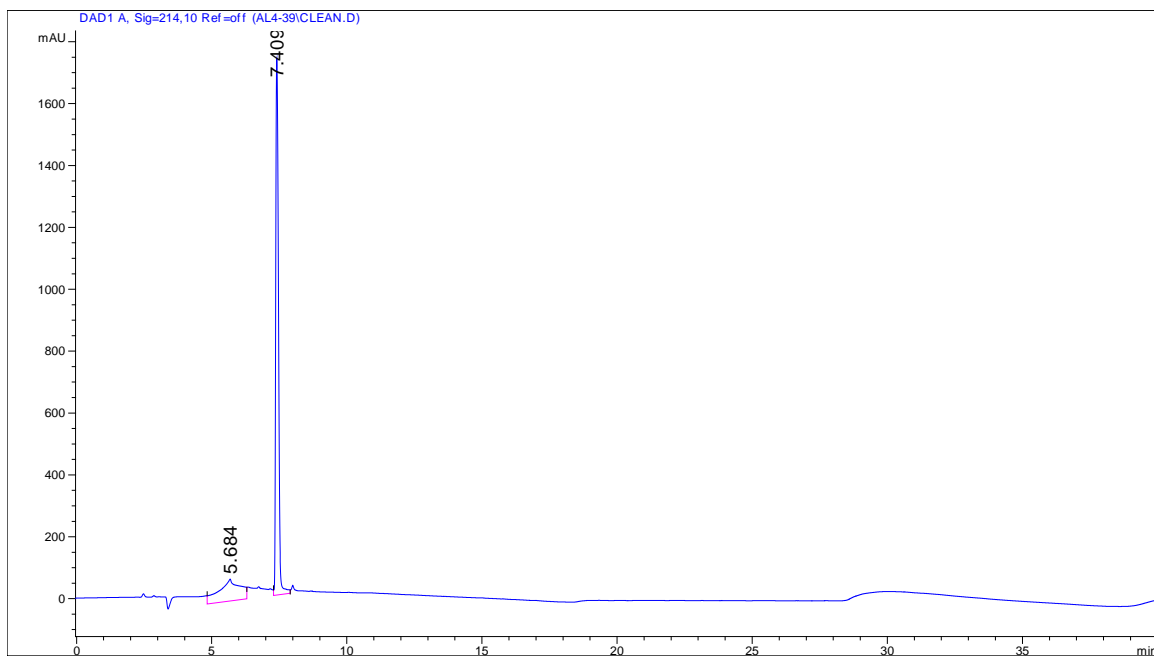

## Compound 2a

Method F,  $t_R = 5.15$  min

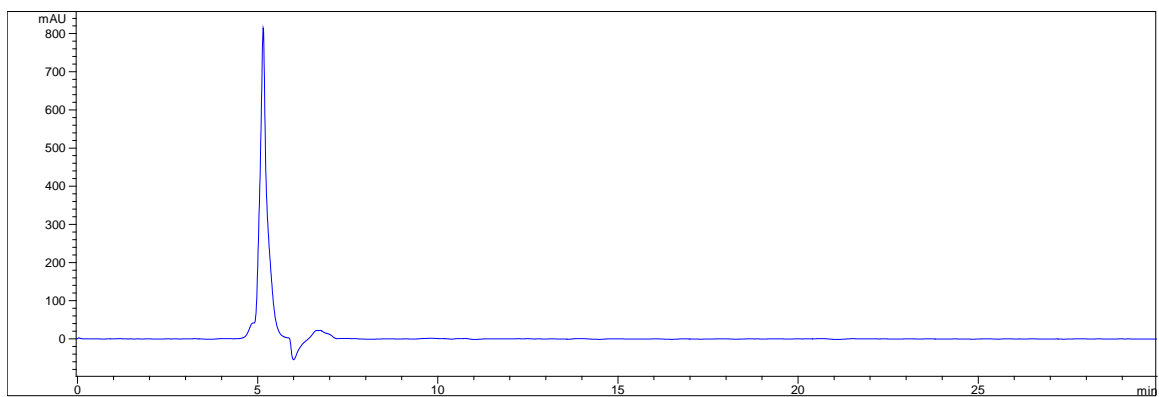

Method G,  $t_R = 5.99$  min

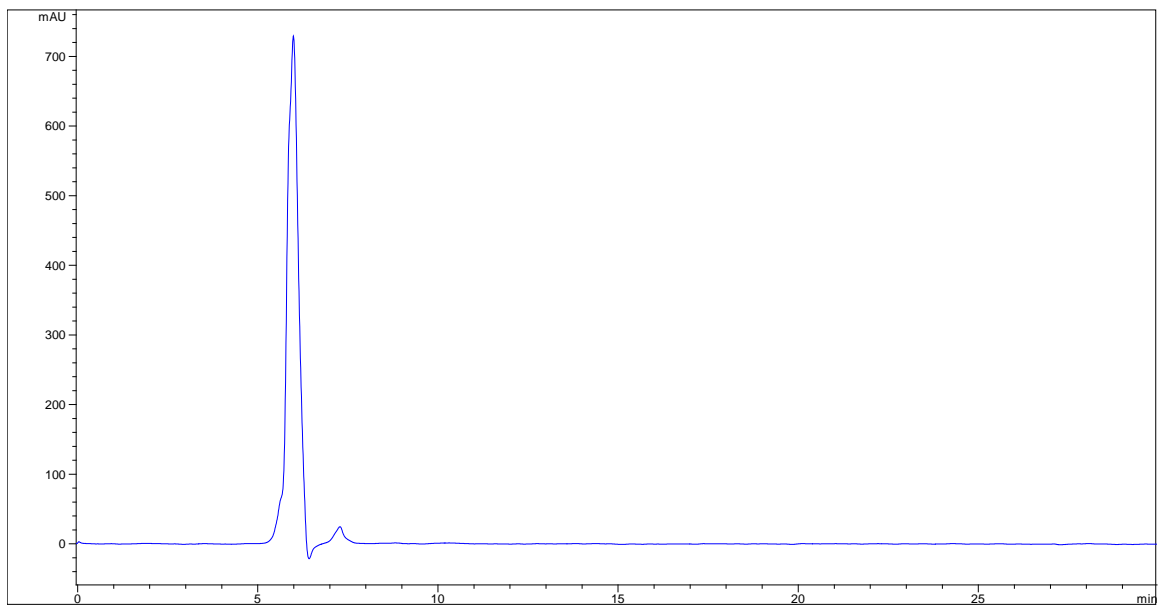

## Compound 2b

Method D,  $t_R = 18.29$  min

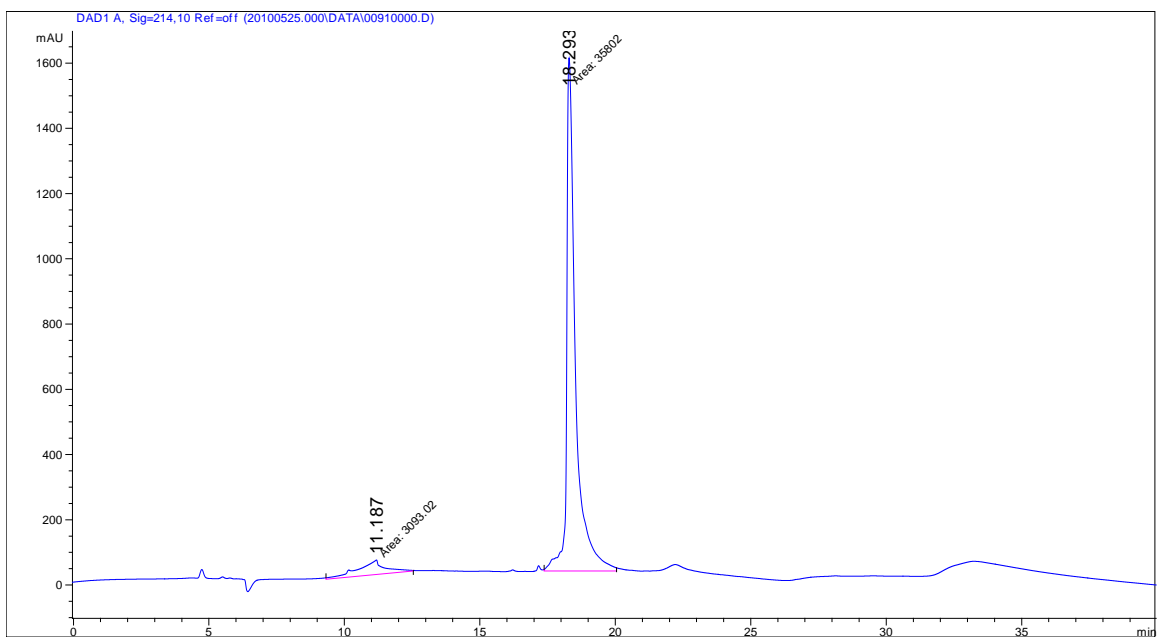

Method E,  $t_R = 13.14$  min

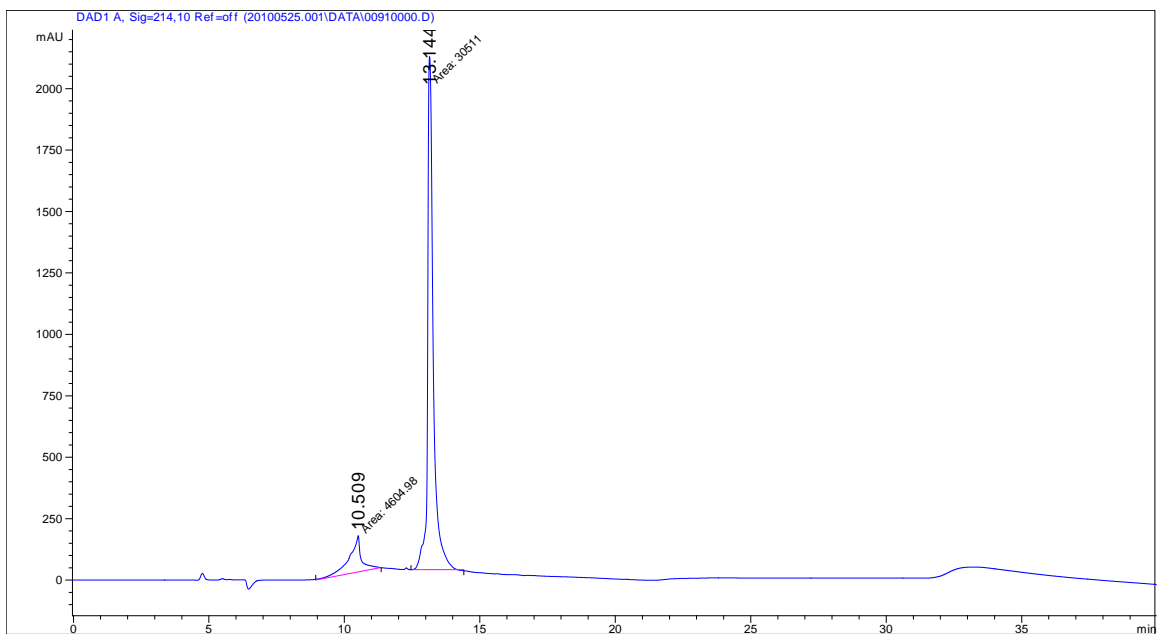

## Compound 2c

Method F,  $t_R = 7.01$  min

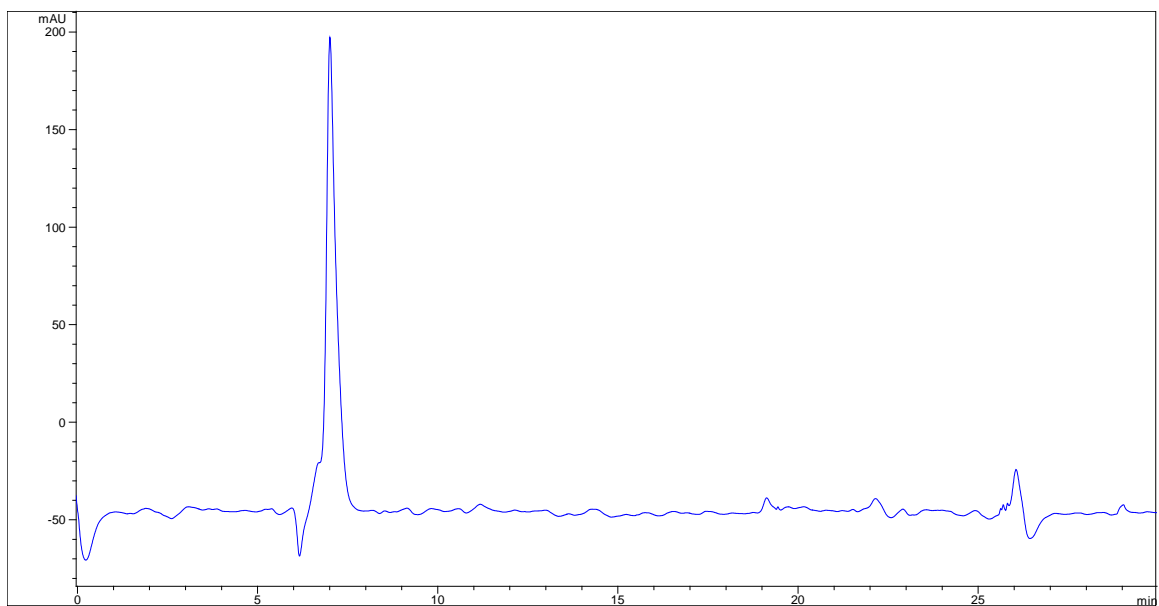

Method G,  $t_R = 12.61$  min

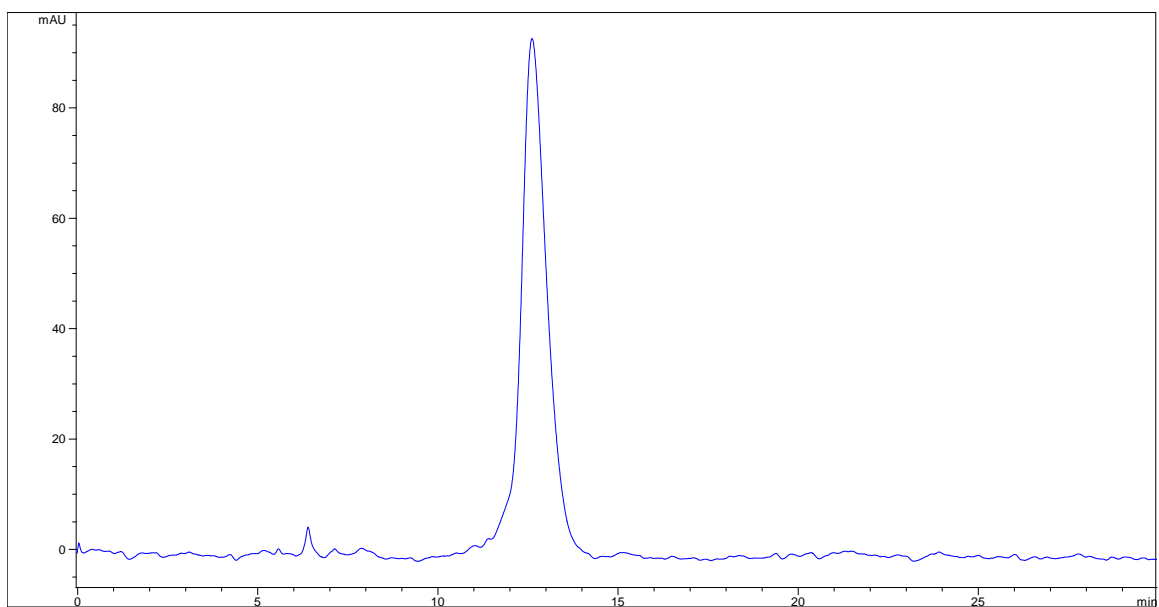

## Compound 2d

Method D,  $t_R = 20.17$  min

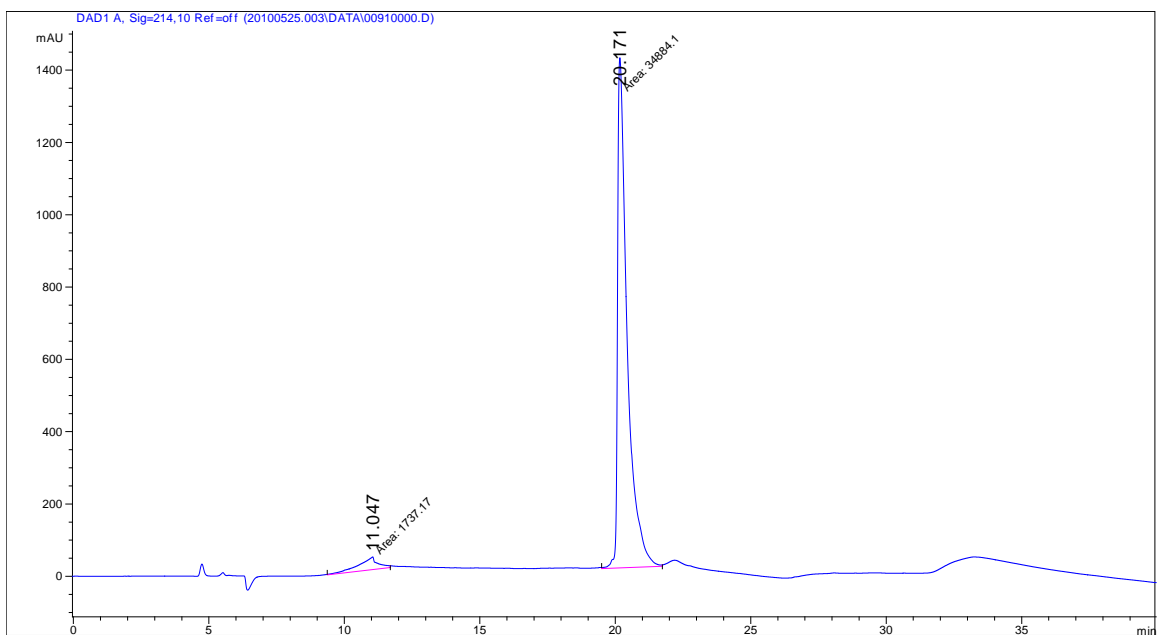

Method E,  $t_R = 13.85$  min

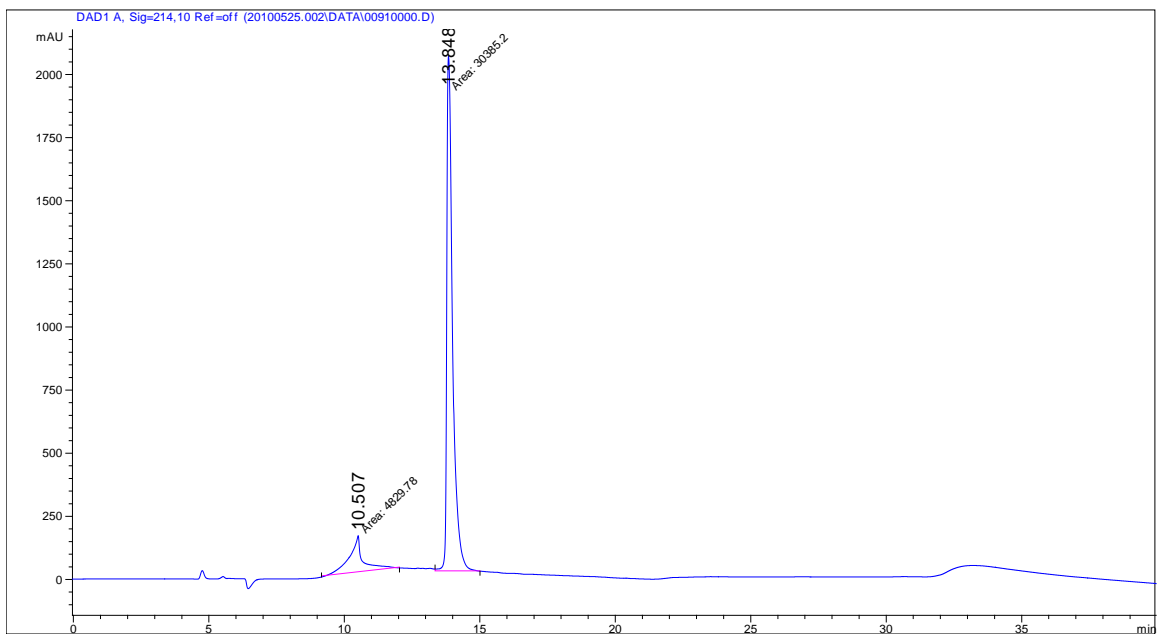

Supplement: c0ob01018a.pdf [file c0ob01018a.pdf]
